# Supplementary material for: Exosome-Based Molecular Transfer Activity of Macrophage-Like Cells Involves Viability of Oral Carcinoma Cells: Size Exclusion Chromatography and Concentration Filter Method
Source: MDPI journal article supplement (doi:10.3390/cells10061328), 2021-05-27
Supplement: s1 [file s1]

Supplementary Figures

**Exosome-based Molecular Transfer Activity of  
Macrophage-like Cells Involves Viability of Oral  
Carcinoma Cells: Size Exclusion Chromatography  
and Concentration Filter Method**

Yanyin Lu <sup>1,2</sup>, Takanori Eguchi <sup>1,3,\*</sup>, Chiharu Sogawa <sup>1,4</sup>, Eman A. Taha <sup>1,5,6</sup>, Manh Tien Tran <sup>1</sup>,  
Toshiki Nara <sup>7</sup>, Penggong Wei <sup>1,8</sup>, Shiro Fukuoka <sup>1,9</sup>, Takuya Miyawaki <sup>2</sup>, Kuniaki Okamoto <sup>1</sup>

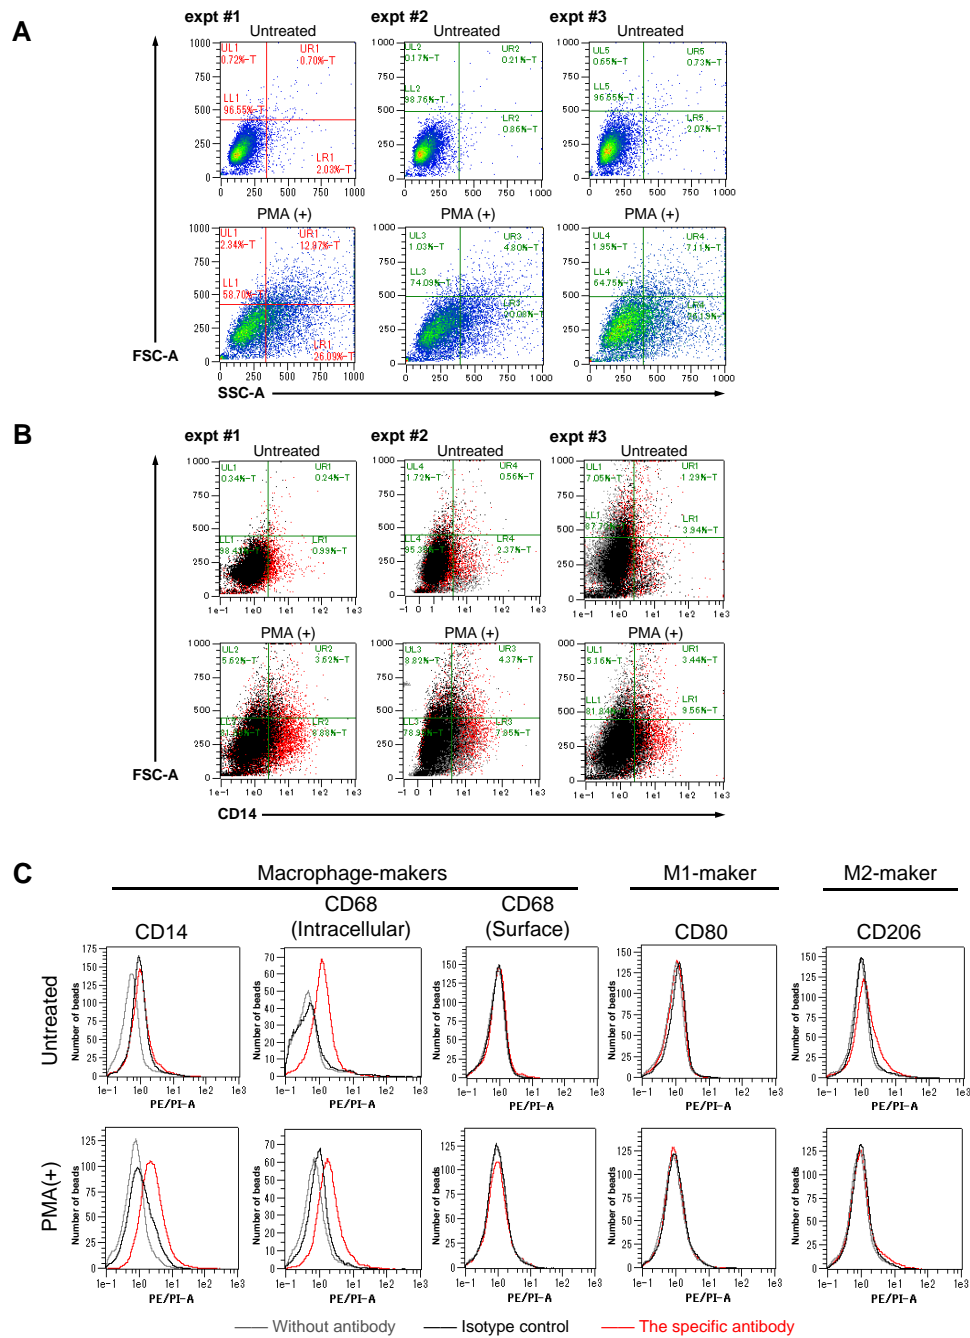

Figure S1: flow cytometry replication data and analysis of CD14, CD68, CD80, and CD206 in PMA-treated and untreated THP-1 cells. (A) Flow cytometry showing size (FSC) and complexity (SSC) of cells. Data were from 3 independent experiments. (B) Flow cytometry detecting cell surface CD14. Data are representative of three independent experiments. (C) Flow cytometry for M0, M1, and M2 type macrophages.

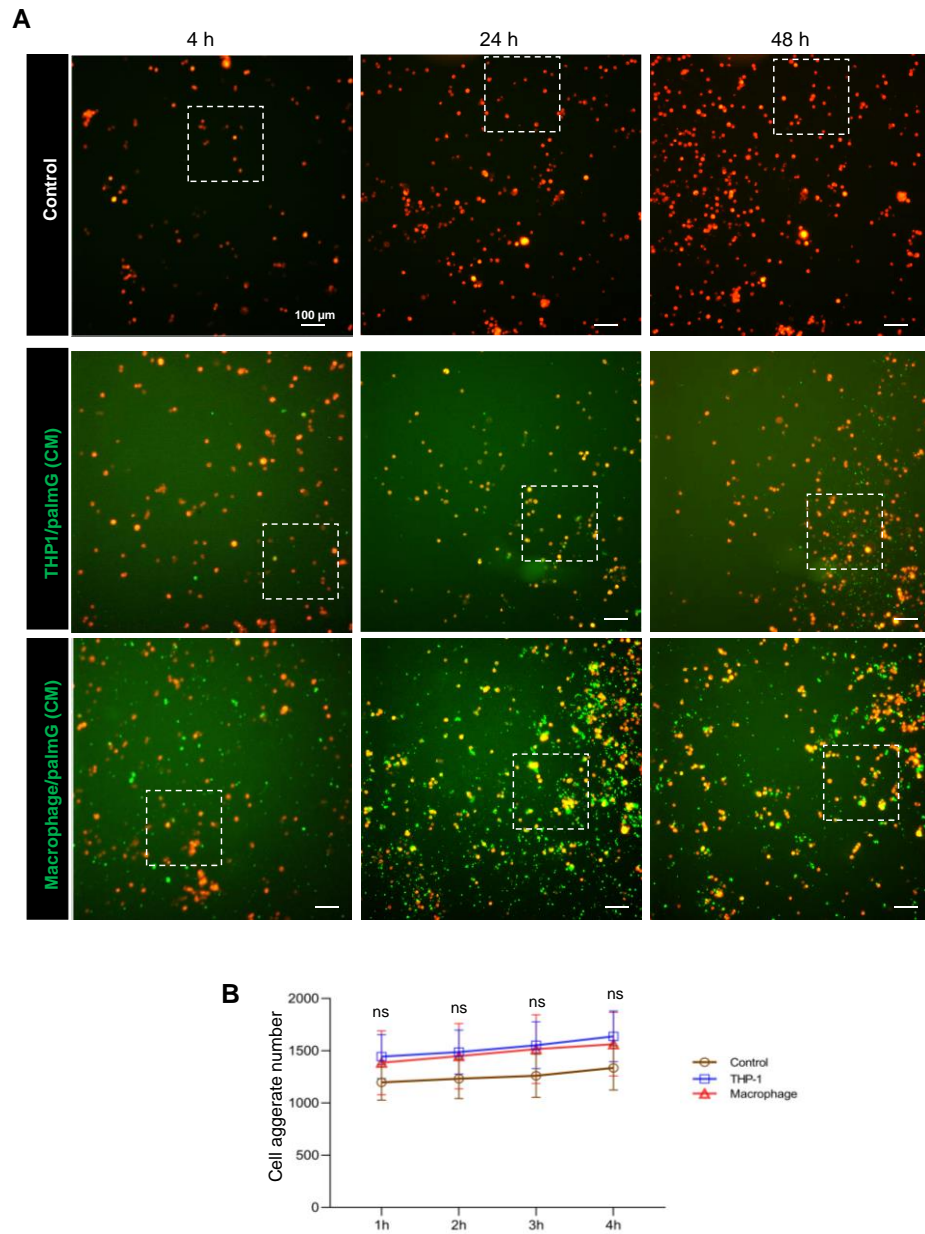

Figure S2: confocal microscopy of molecular transfer of palmGFP from THP1/palmG and macrophage/palmG cells to HSC3/palmT in 3D culture. (A) Full images of ArrayScan supporting Figure 2C. Dashed border: the field shown in Figure 2C. (B) The number of cell aggerates within the first 4 h supporting Figure 2C. No significant difference was found between the numbers of cell aggerates of each group.

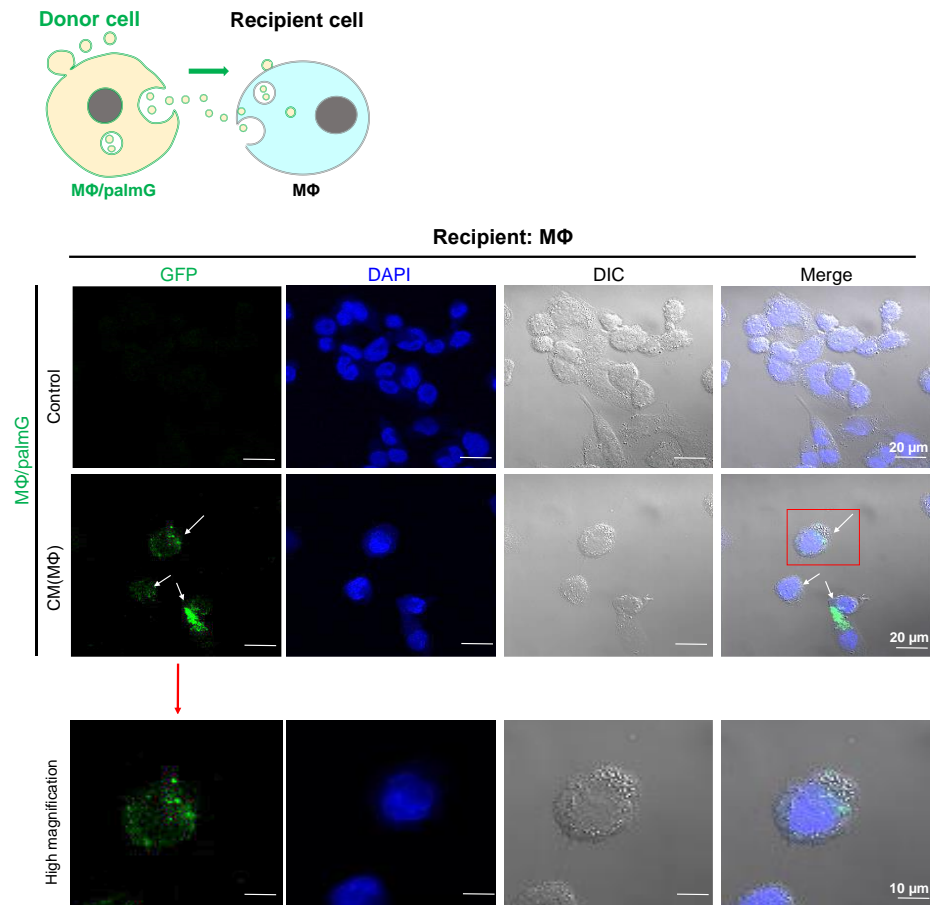

Figure S3: confocal microscopy of the molecular transfer of palmGFP from macrophage-EVs to receiver macrophages in 2D culture. Arrow, palmGFP transferred.

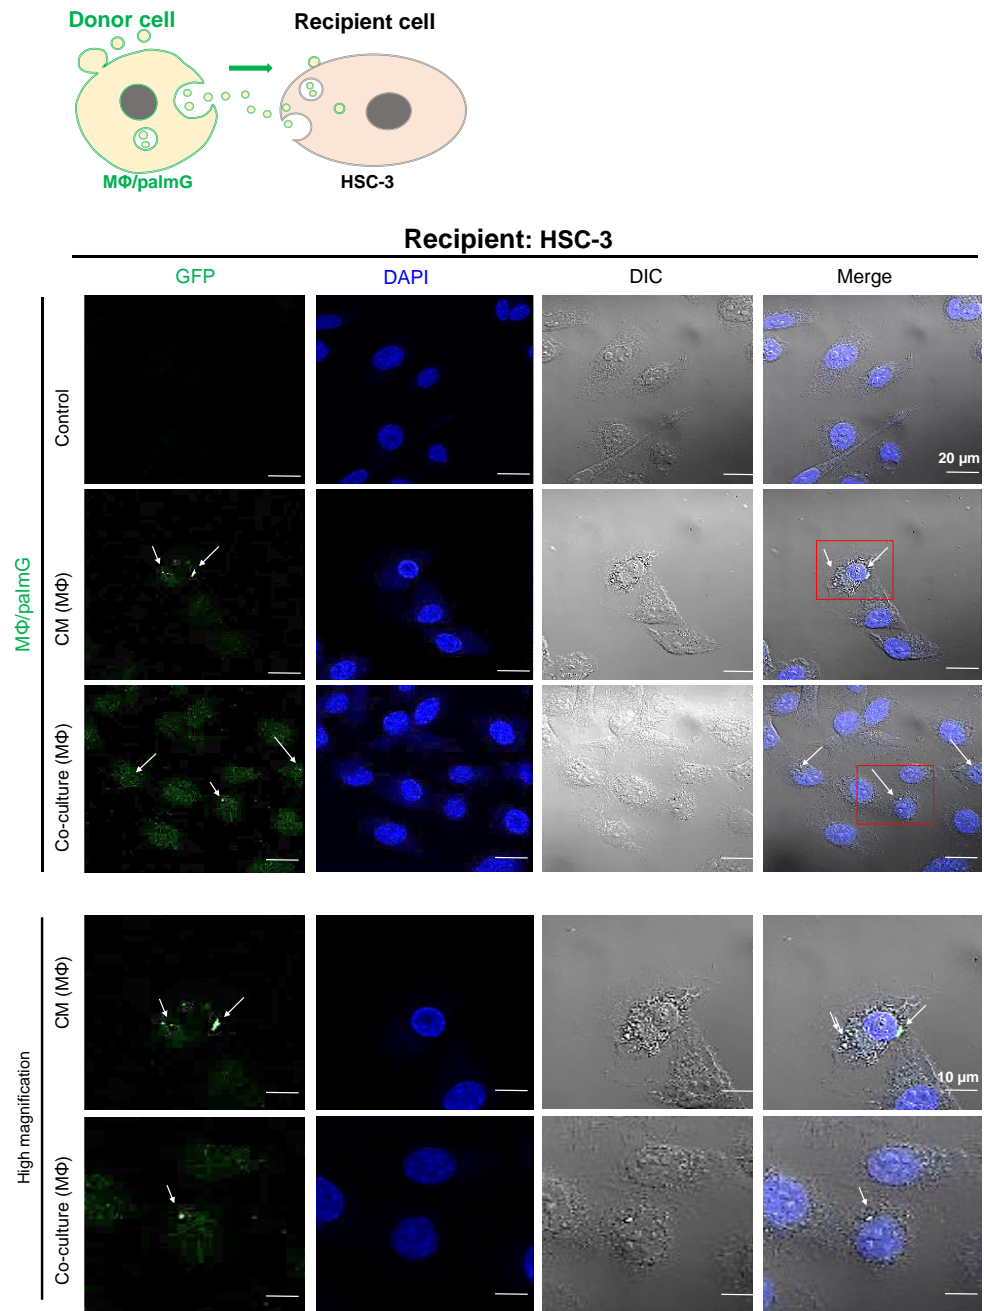

Figure S4: confocal microscopy of the molecular transfer of palmGFP from macrophage-EVs to receiver HSC-3 oral carcinoma cells in 2D culture. Arrow, palmGFP transferred.

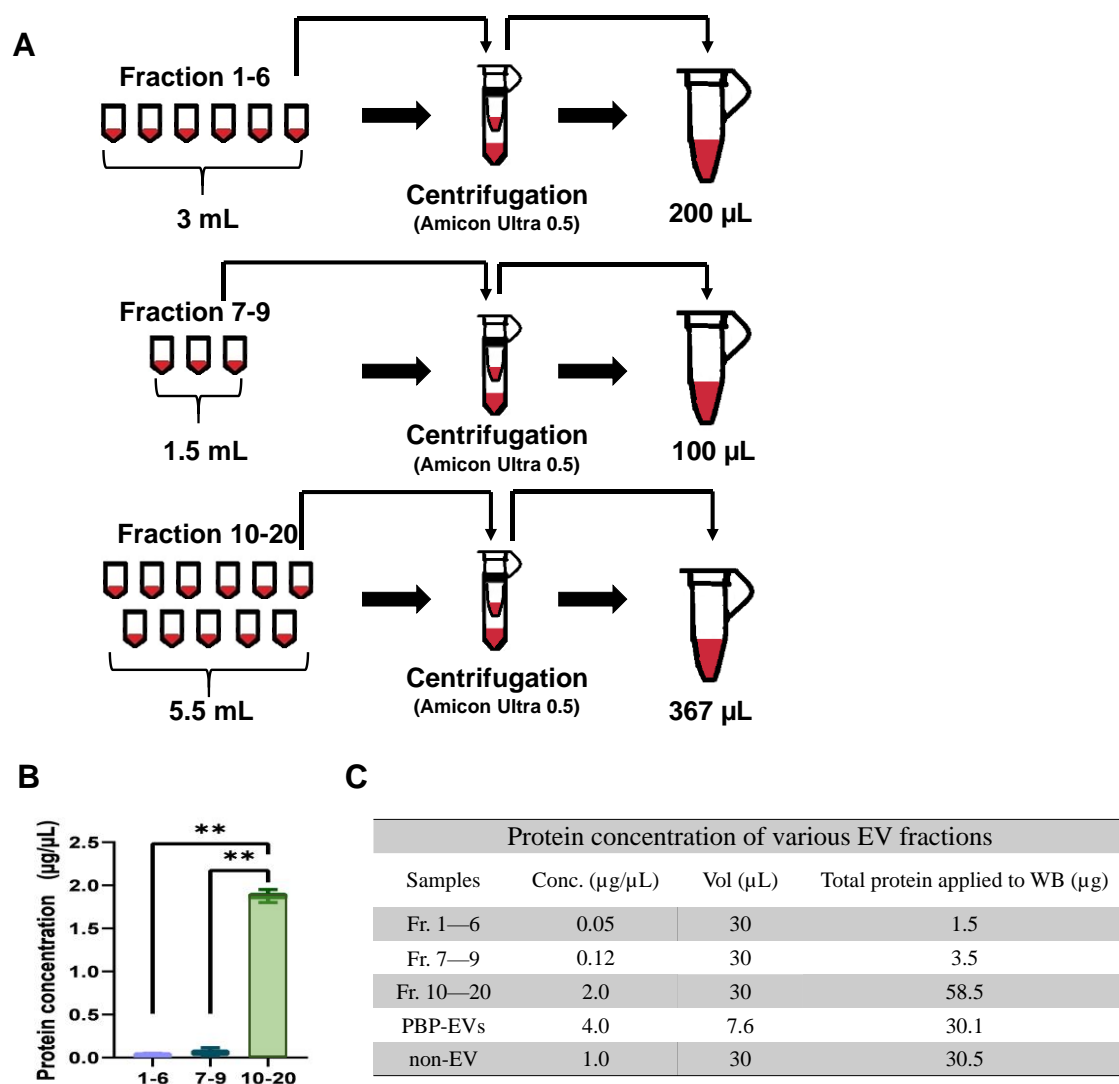

Figure S5: Concentration filter method for EV fractions. (A) Fr. 1-6 were gathered into a single tube and then concentrated using ultrafiltration. Fr. 7-9 and Fr.10-20 were also concentrated by the same method. (B) Protein concentrations in the fraction 1-6, 7-9, and 10-20. N=2. \*\*P<0.01. (C) A table showing the protein concentrations of the fractions and protein amount applied in western blotting.

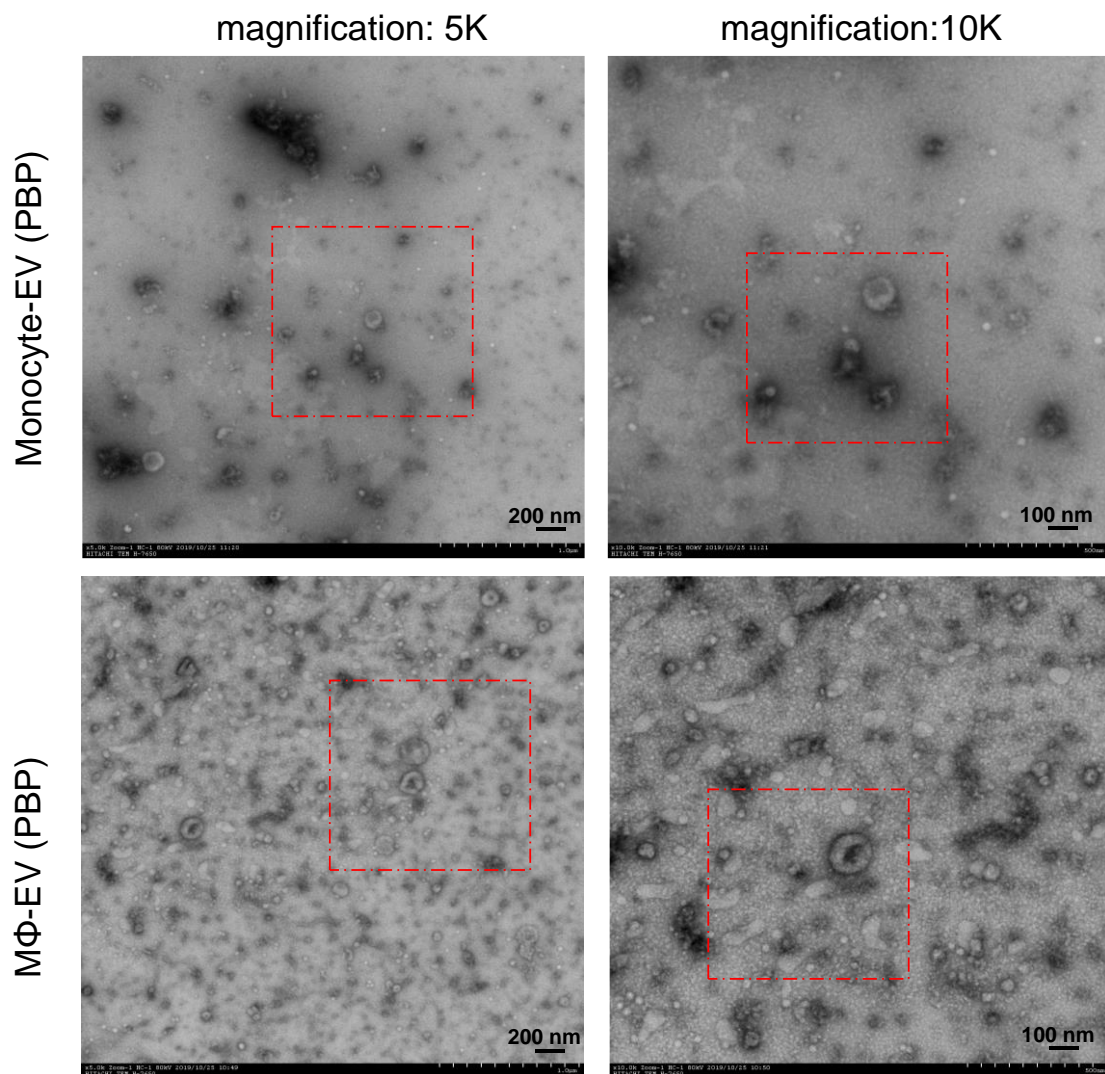

Figure S6: full images of TEM shown in Figure 5A and 5B. Dashed border: the field shown in Figure 5A and 5B.



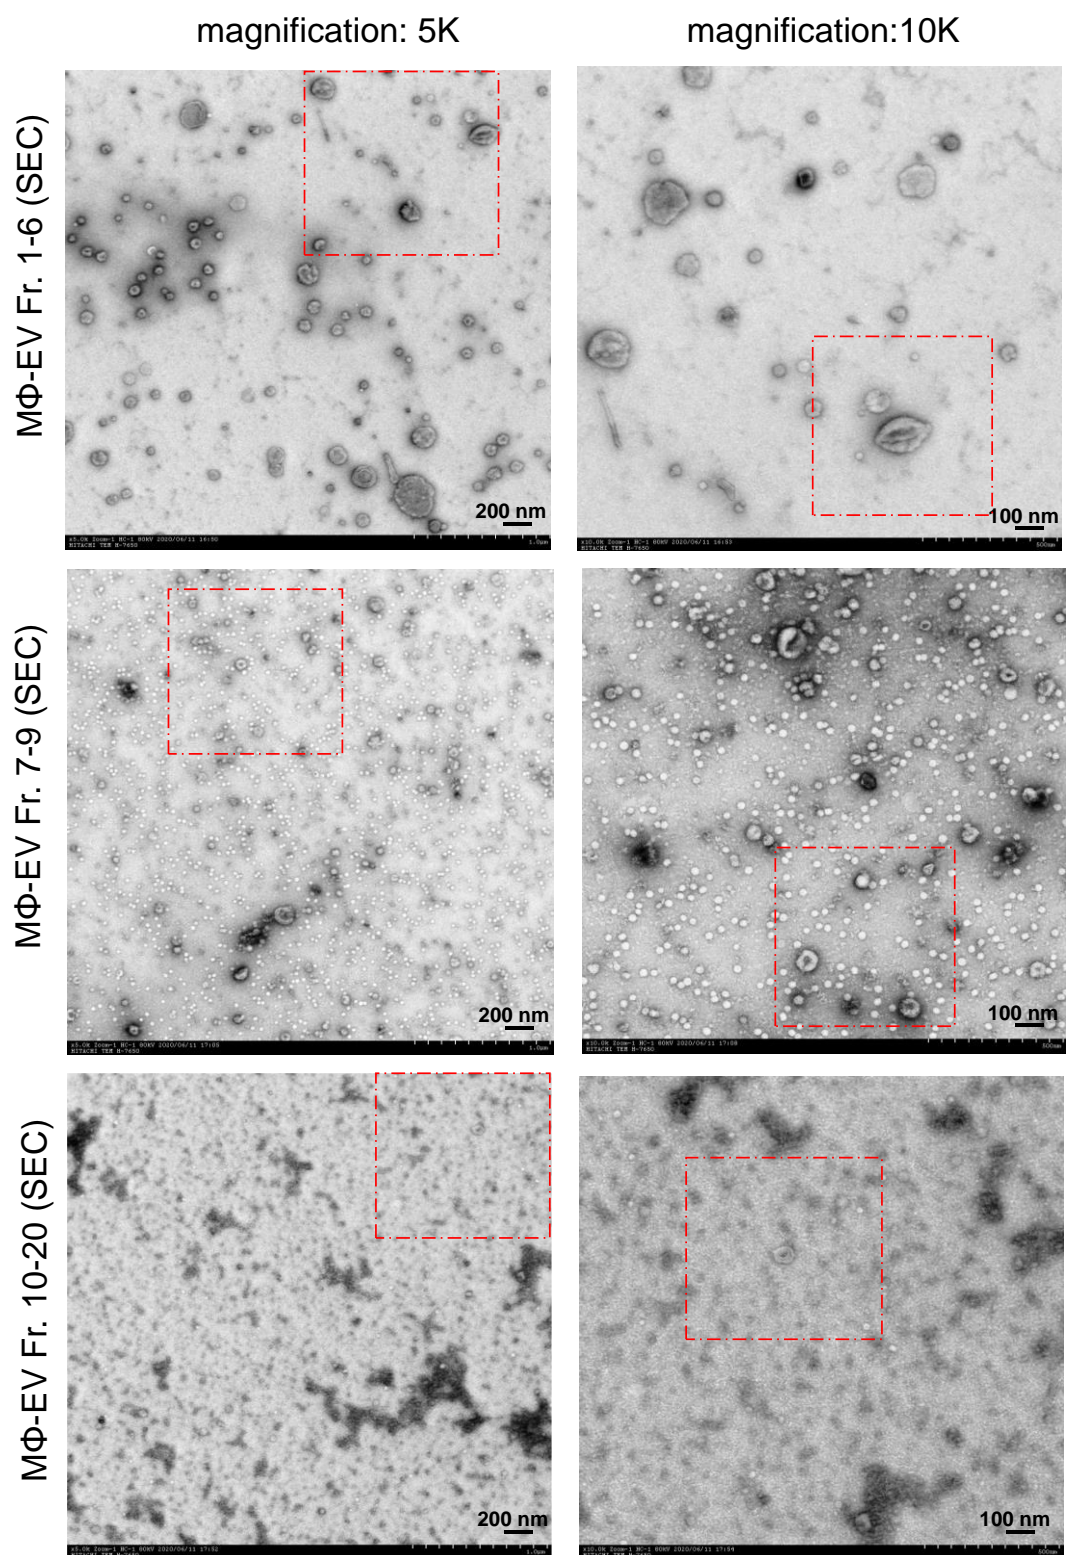

Figure S7: full images of TEM shown in Figure 5C, 5D and 5E. Dashed border: the field shown in Figure 5C, 5D and 5E.



### CD 9

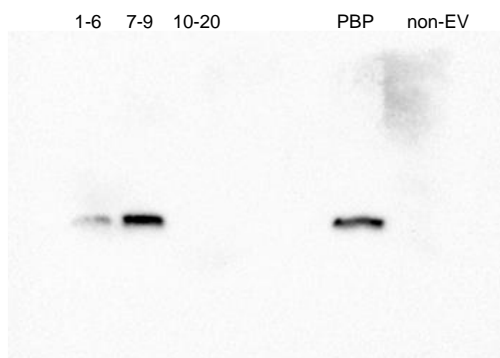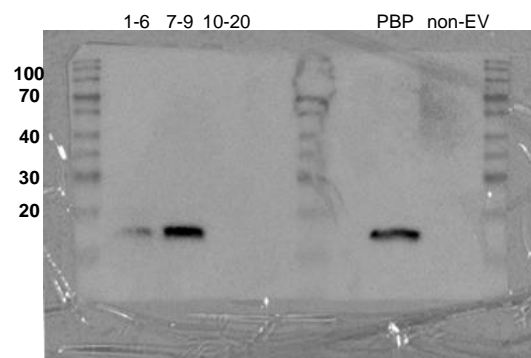

### HSP90α

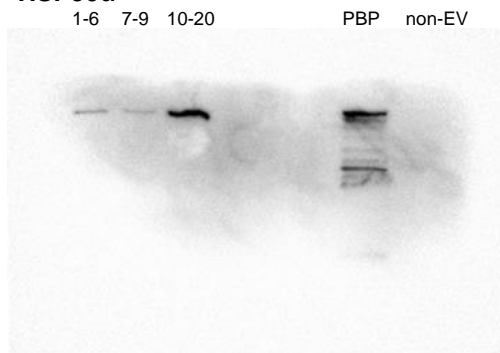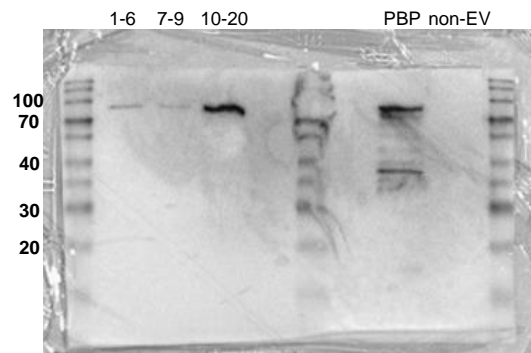

### β-actin

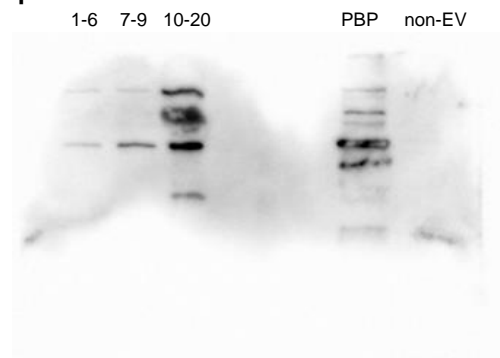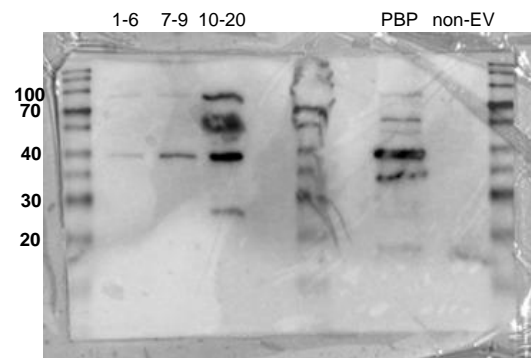

Figure S8: full images of western blot analysis shown in Figure 5H

## HSP90 $\beta$

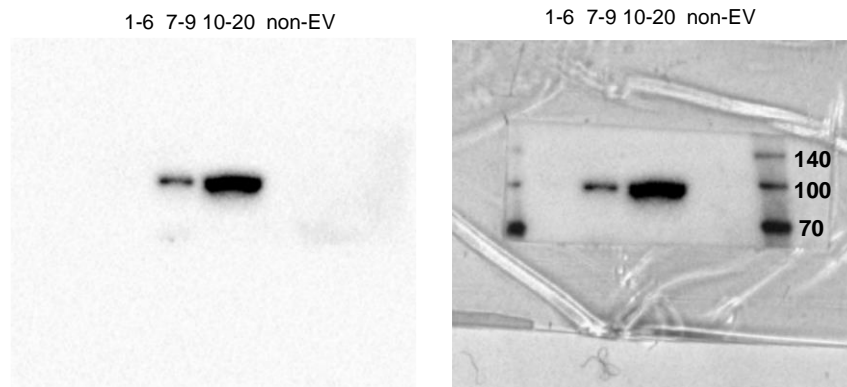

## CD63

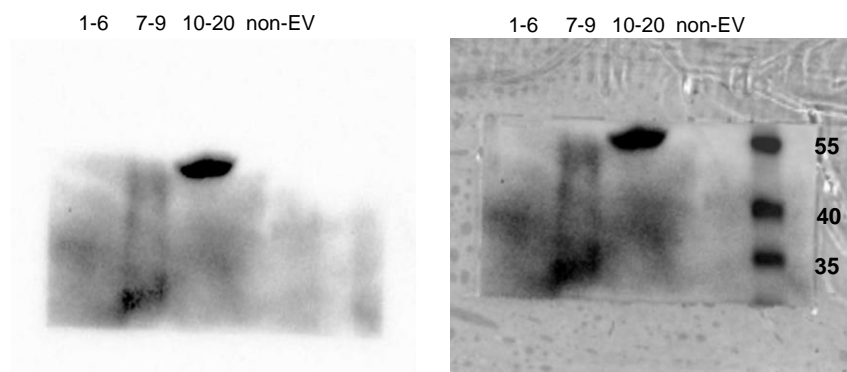

## CD9

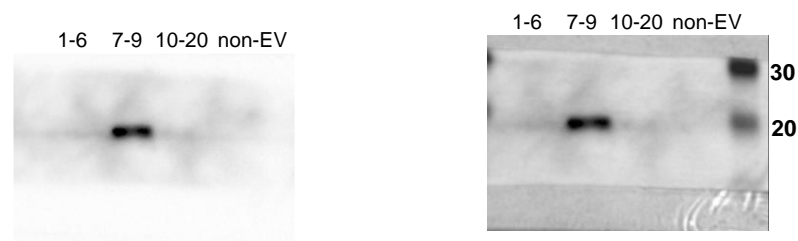

Figure S9: full images of western blot analysis shown in Figure 5I.

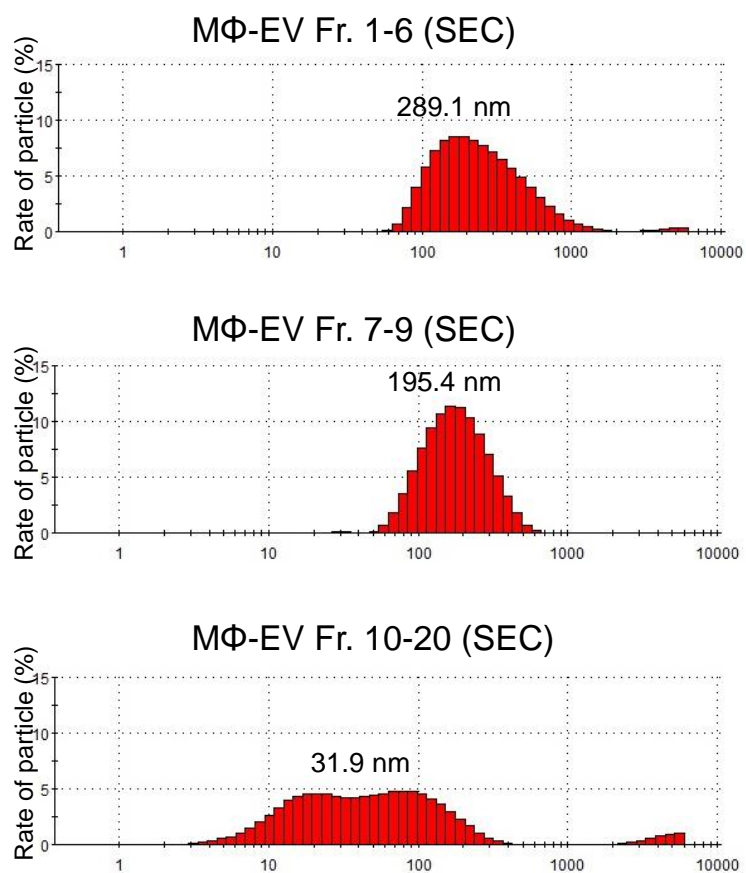

Figure S10: particle diameter distribution of macrophage EV fractions used in Fig 5L.

| Protein concentration of various EV fractions from macrophage/PalmG |               |          |                    |
|---------------------------------------------------------------------|---------------|----------|--------------------|
| Samples                                                             | Conc. (μg/μL) | Vol (μL) | Total Protein (μg) |
| 1-3                                                                 | 0.13          | 20       | 2.7                |
| 4-6                                                                 | 0.19          | 20       | 3.7                |
| 7-9                                                                 | 0.21          | 20       | 4.2                |
| 10-12                                                               | 0.18          | 20       | 3.6                |
| 13-15                                                               | 0.66          | 20       | 13.3               |
| 16-18                                                               | 1.3           | 20       | 26.0               |
| 19-21                                                               | 0.82          | 20       | 16.4               |
| 1-21                                                                | 5.3           | 5        | 26.6               |

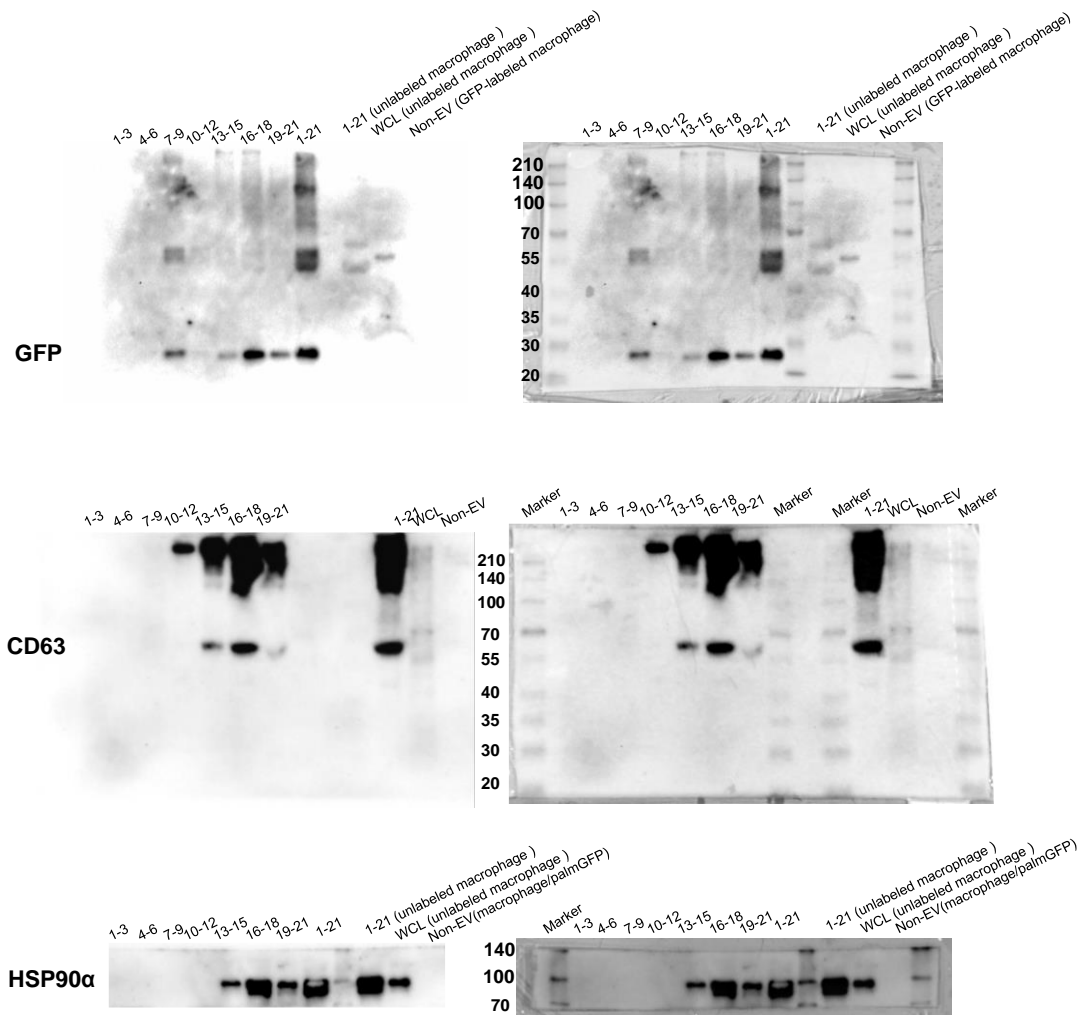

Figure S11: full images of western blot analysis shown in Figure 8A.

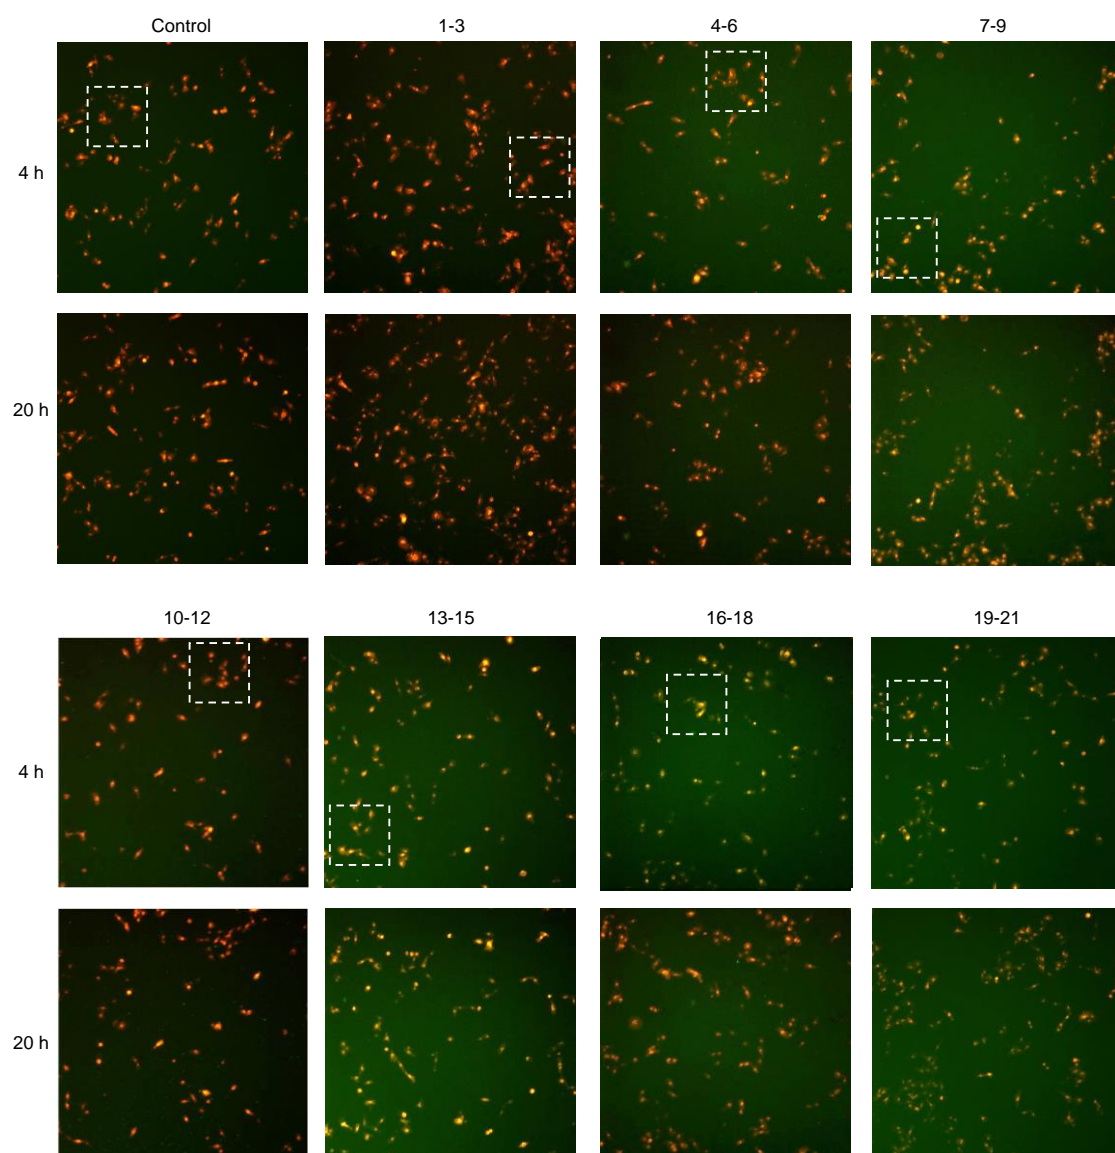

Figure S12: Full images of representative field data obtained in ArrayScan shown in Figure 8C.  
Dashed border: the field shown in Figure 8C.
